# Supplementary material for: Dual RNA-seq analysis of in vitro infection multiplicity and RNA depletion methods in Chlamydia-infected epithelial cells
Source: PubMed Central journal article supplement (PMC8128910; doi:10.1038/s41598-021-89921-x), 2021-05-17

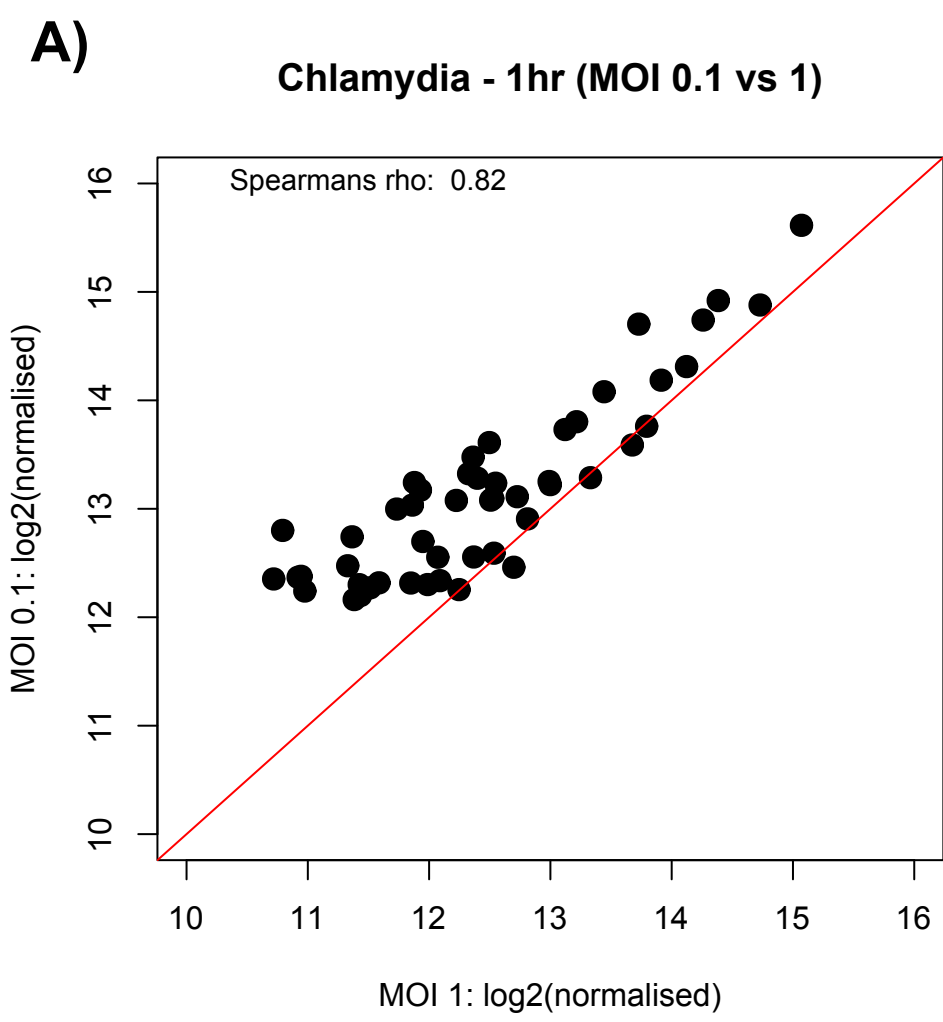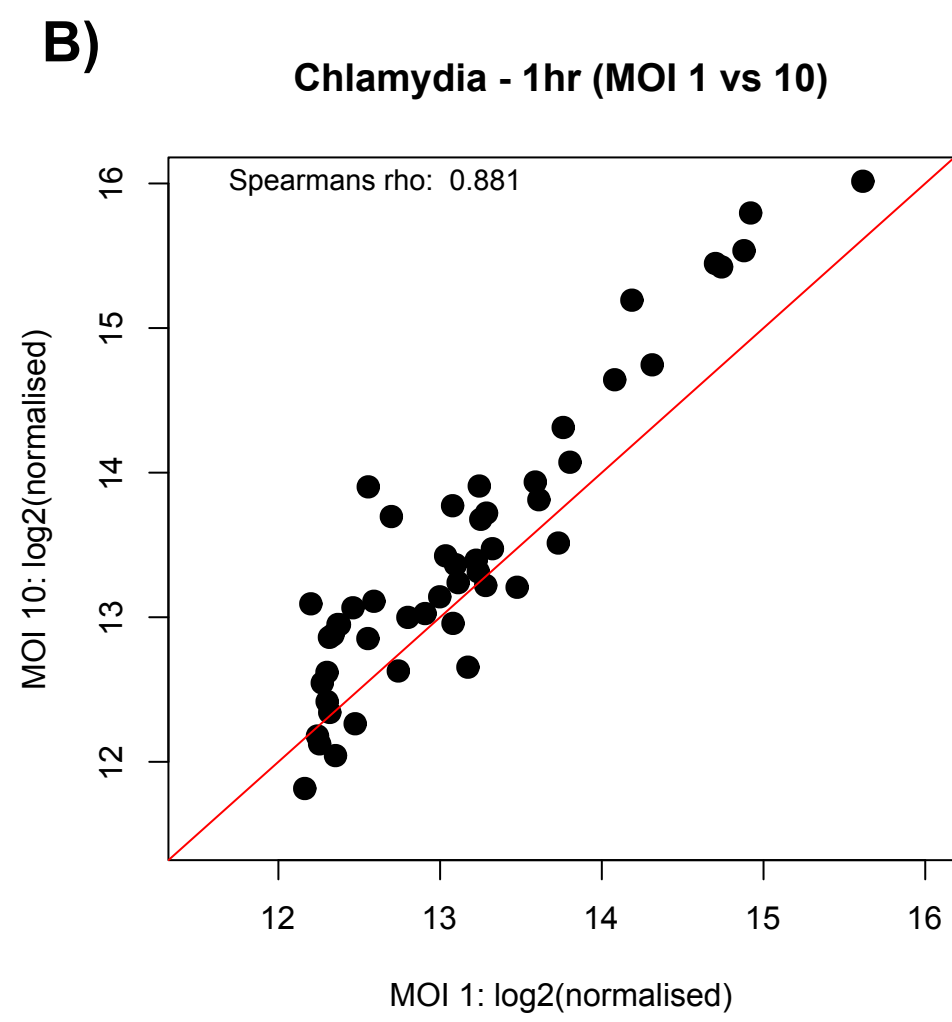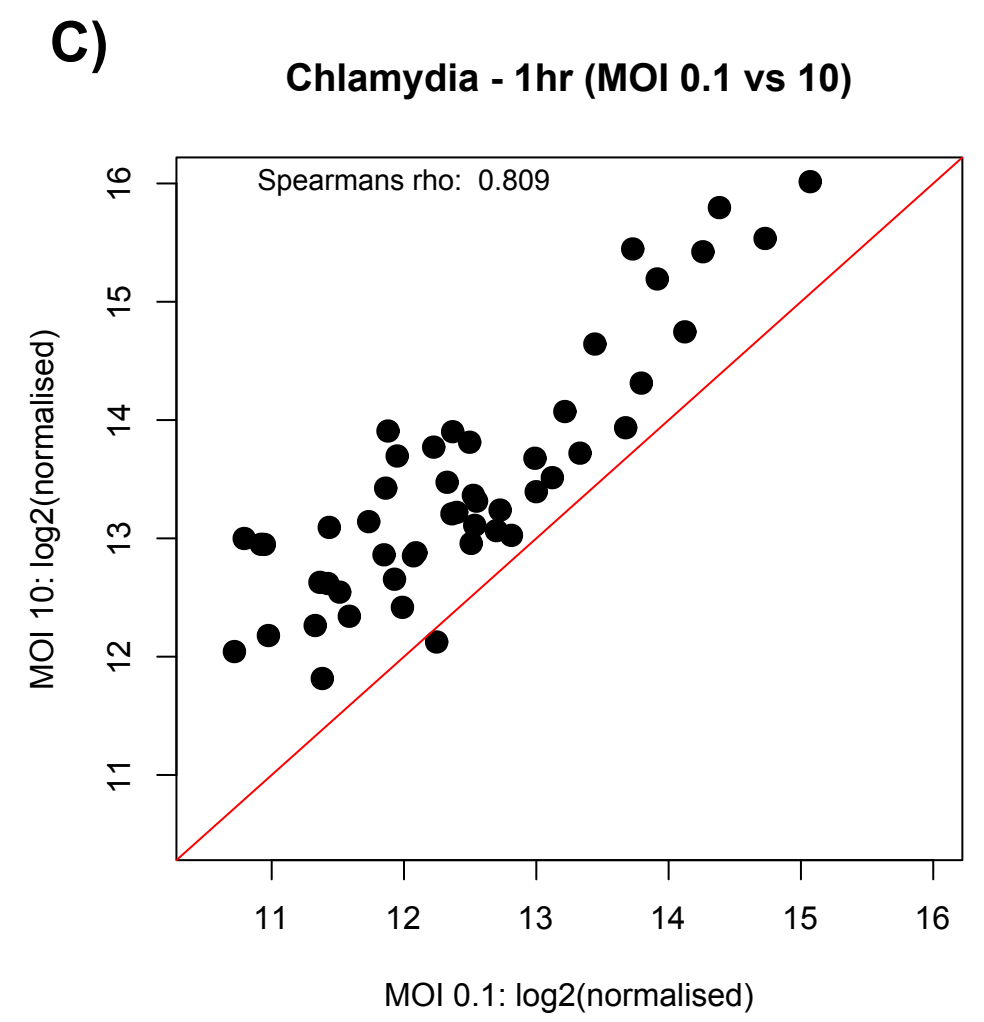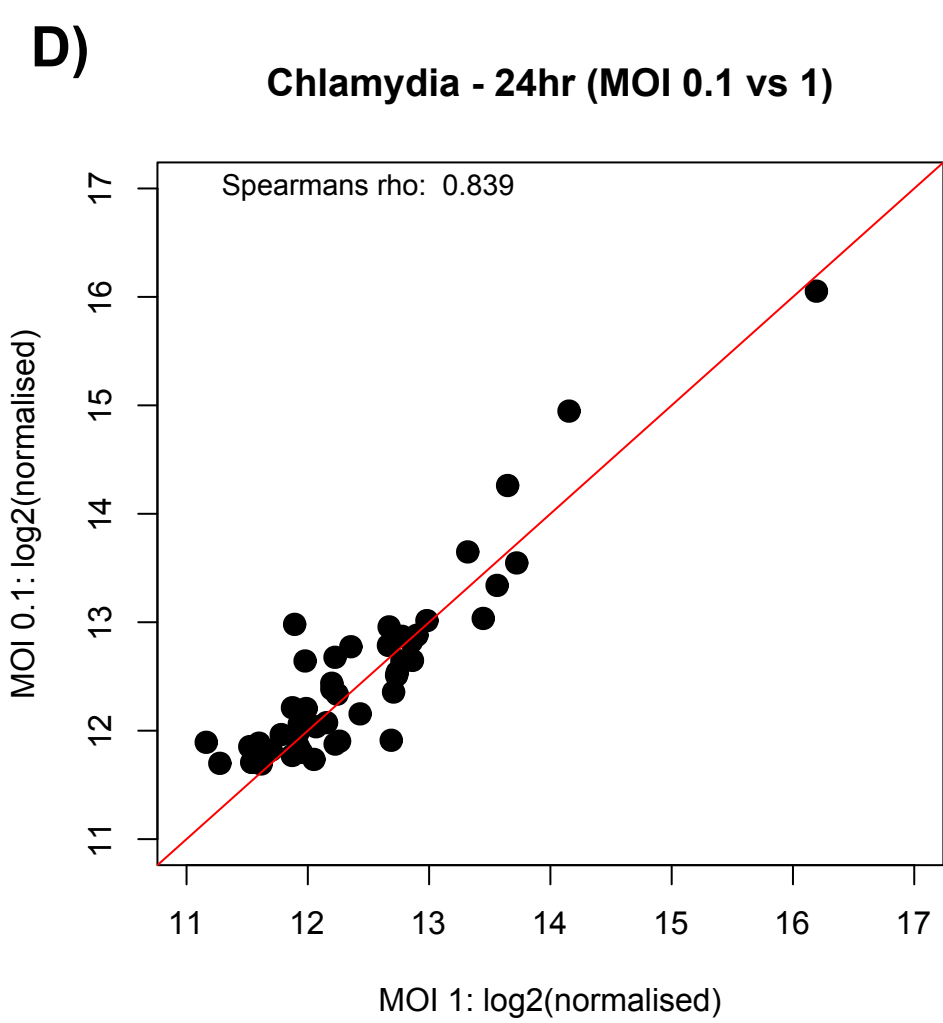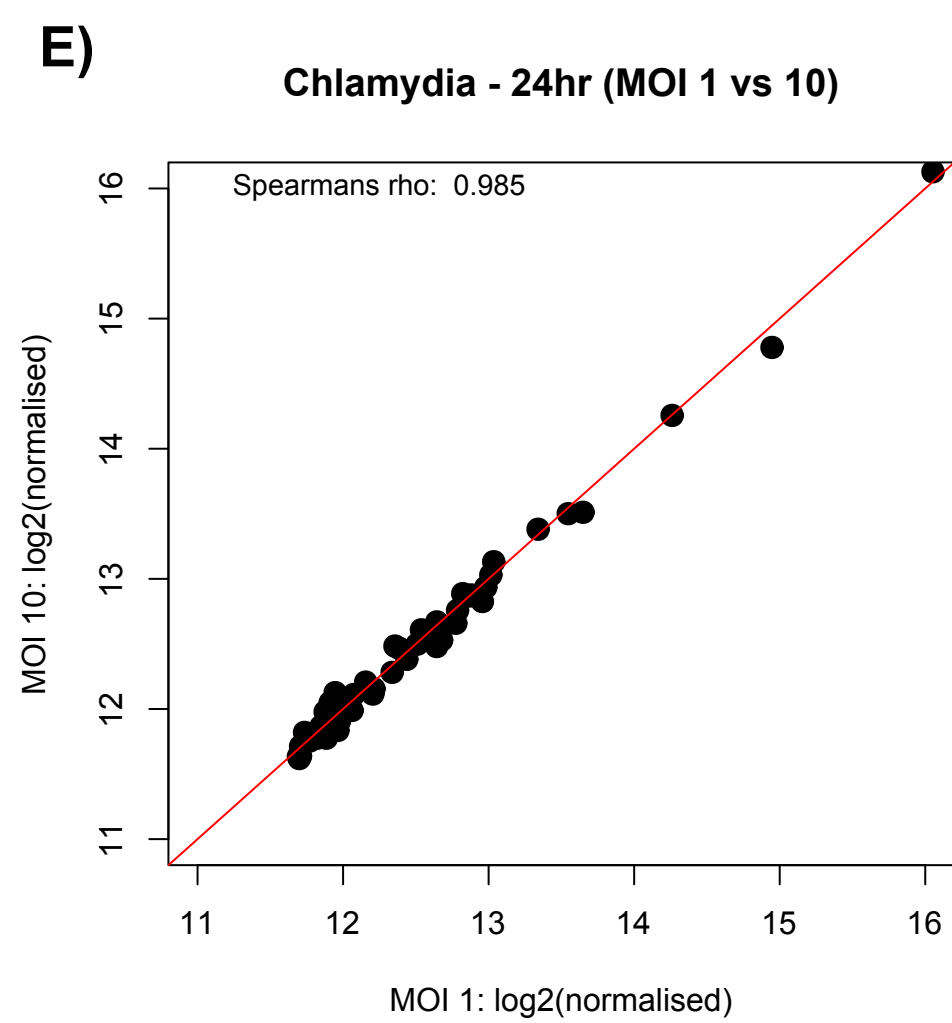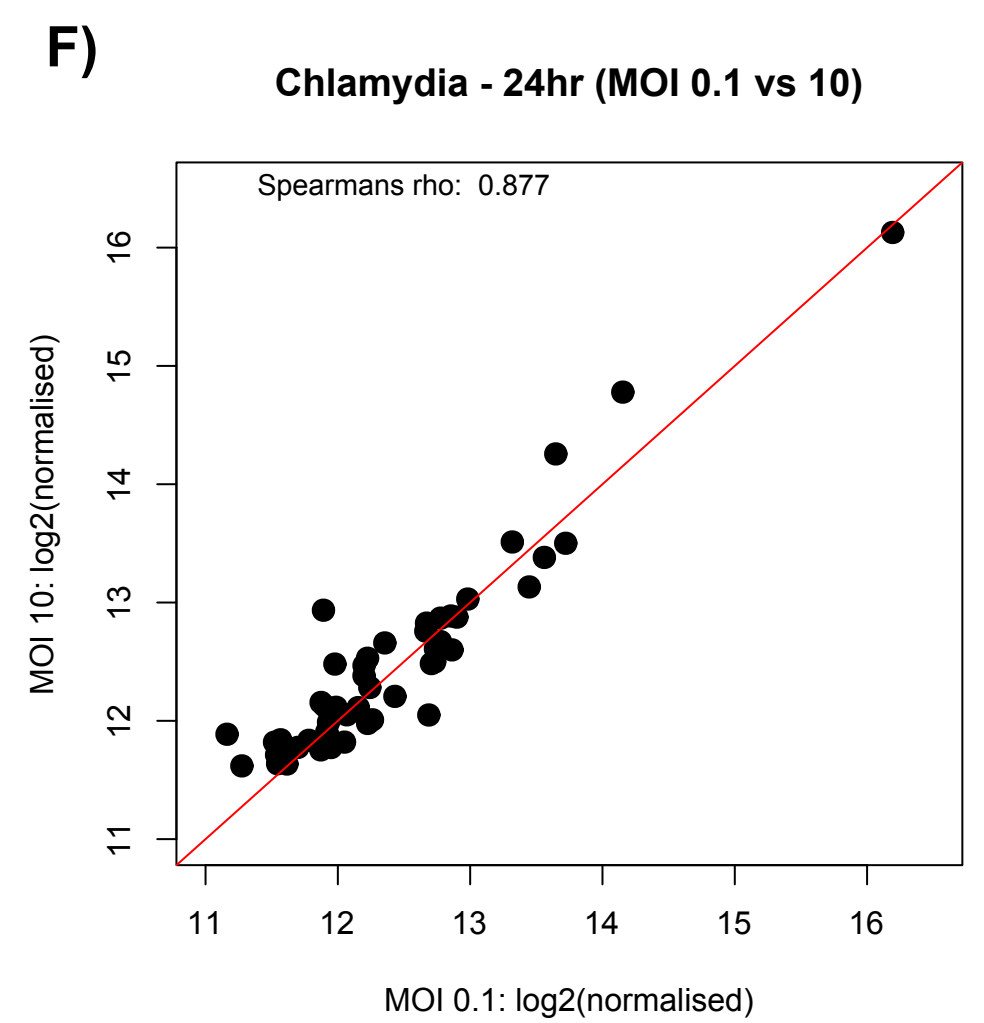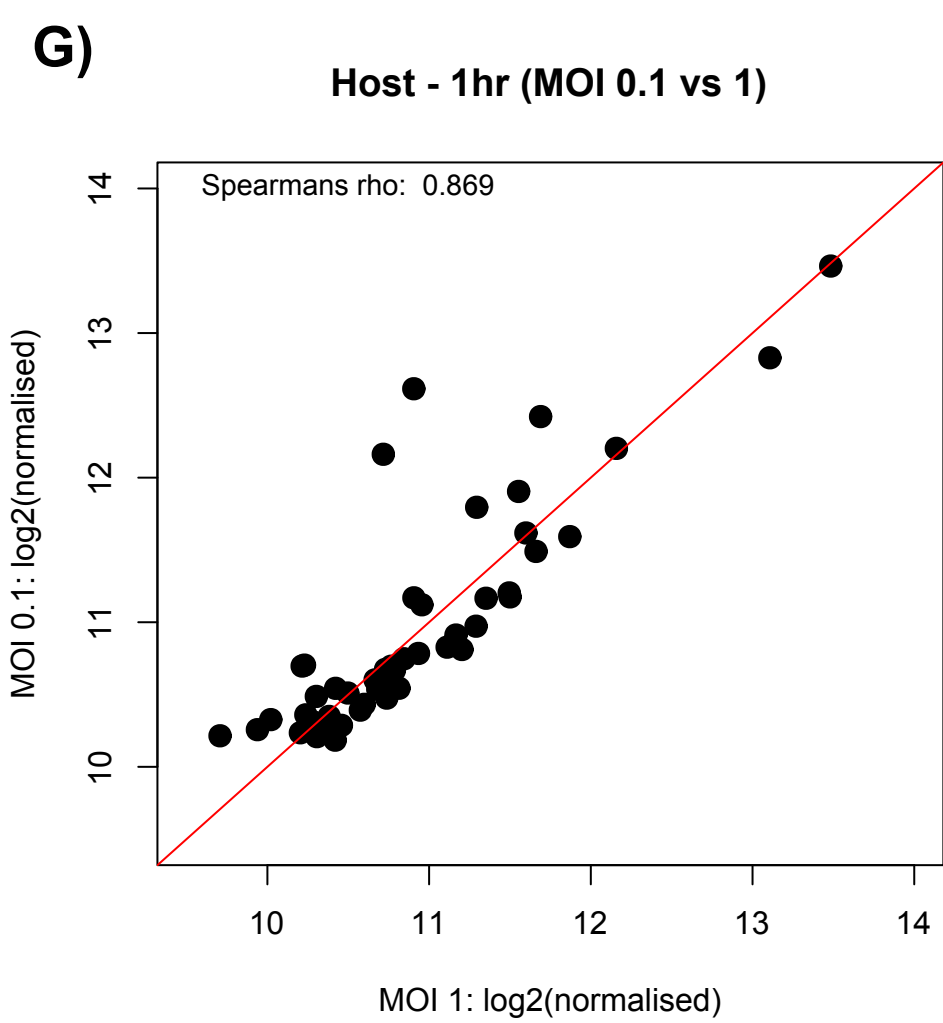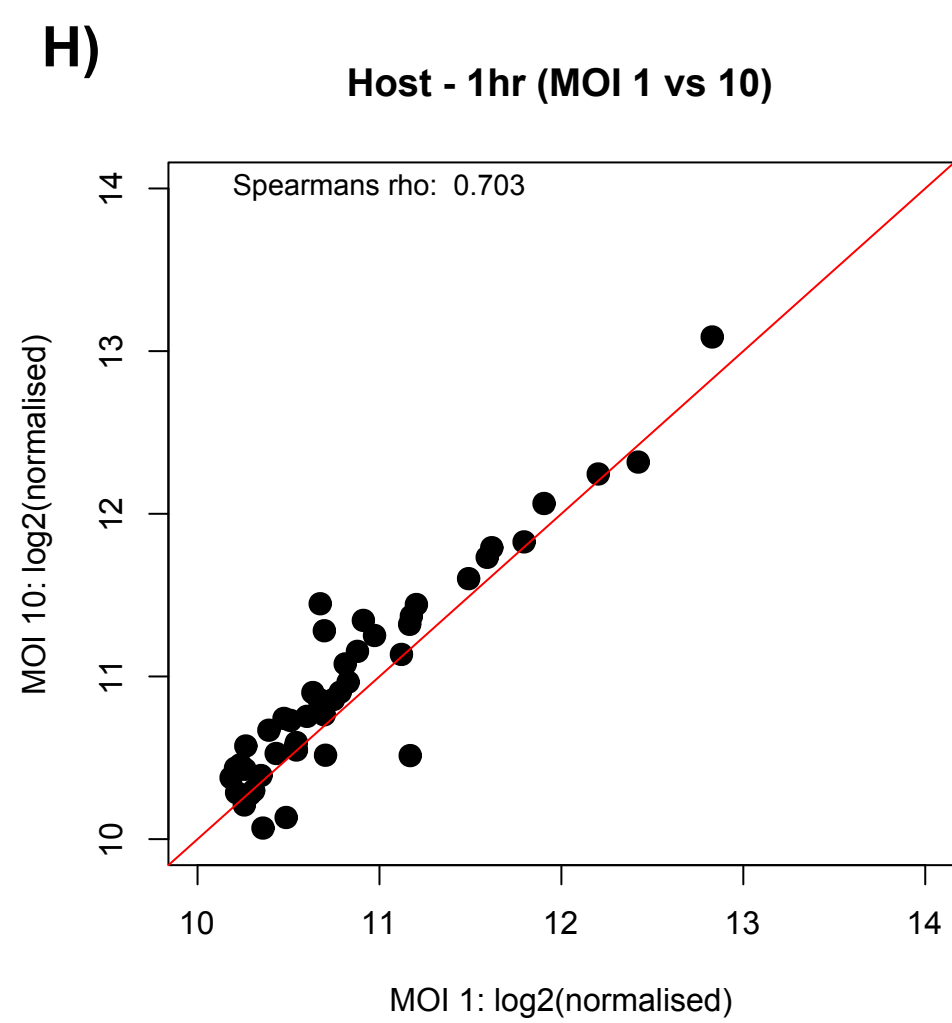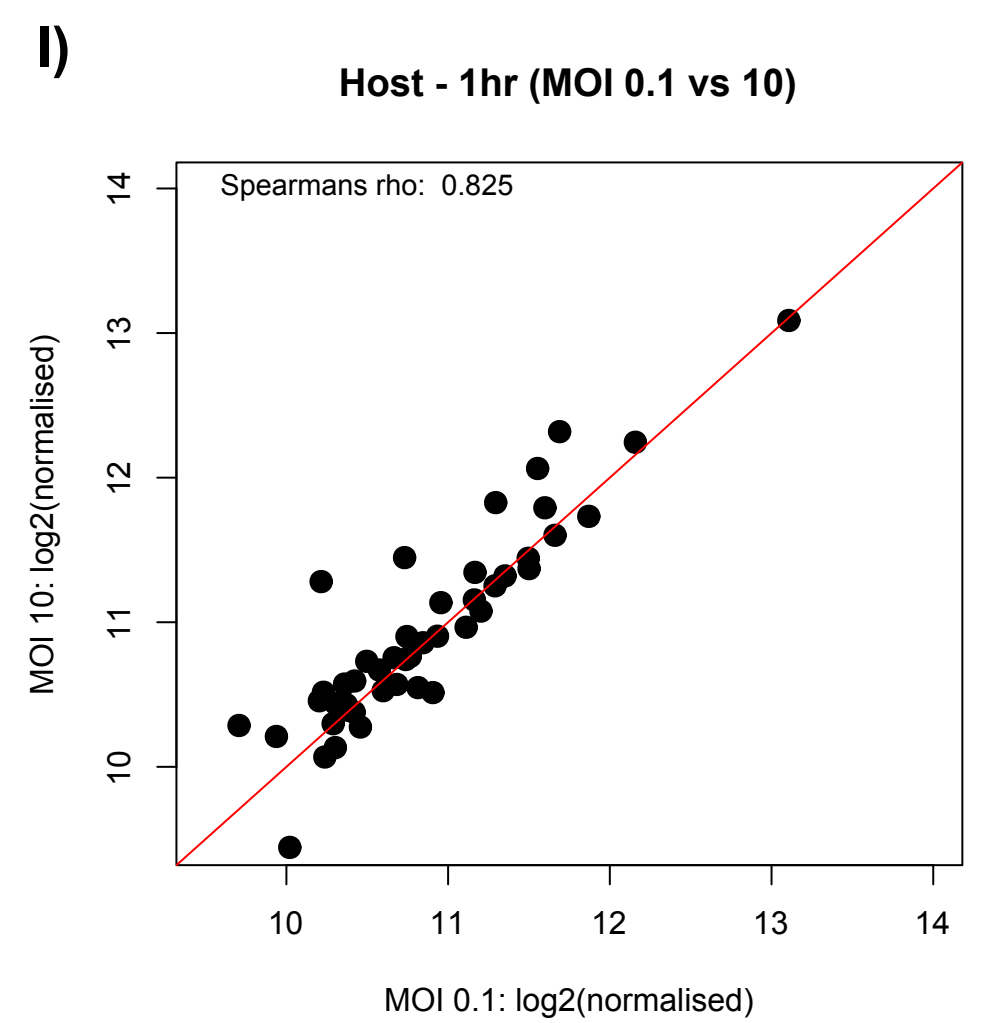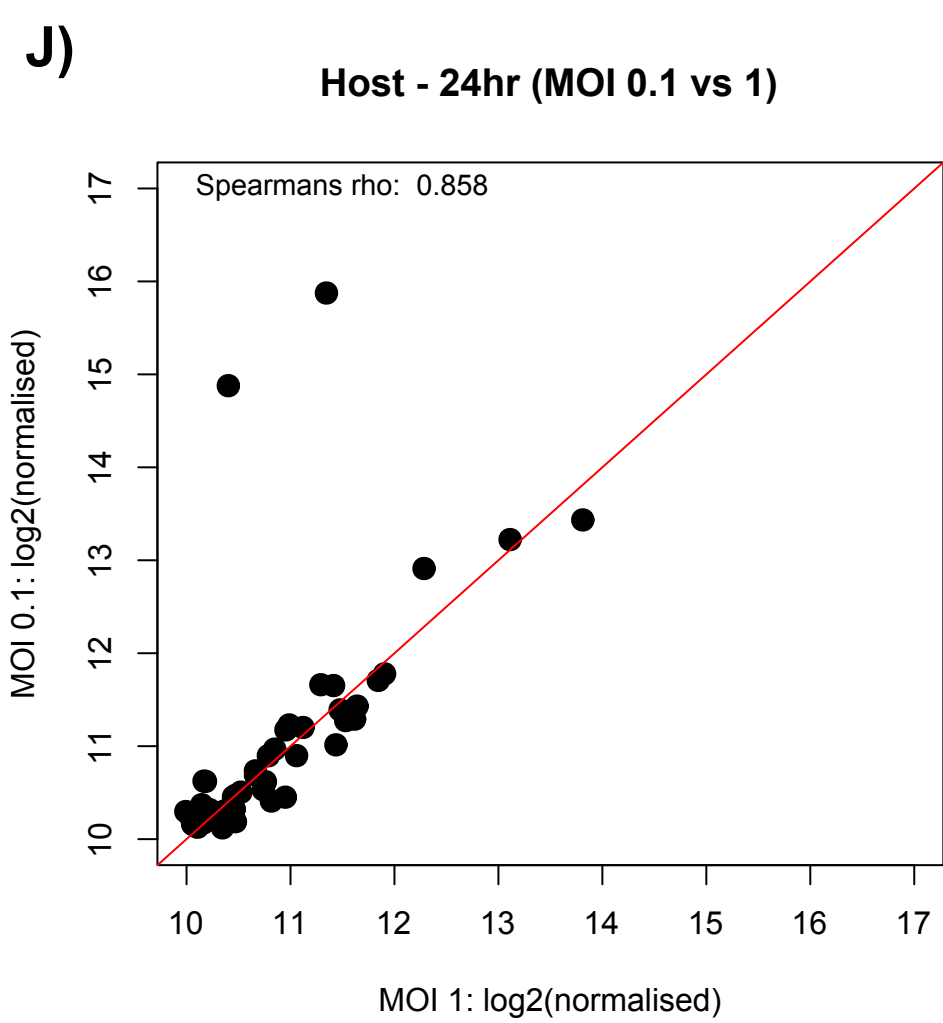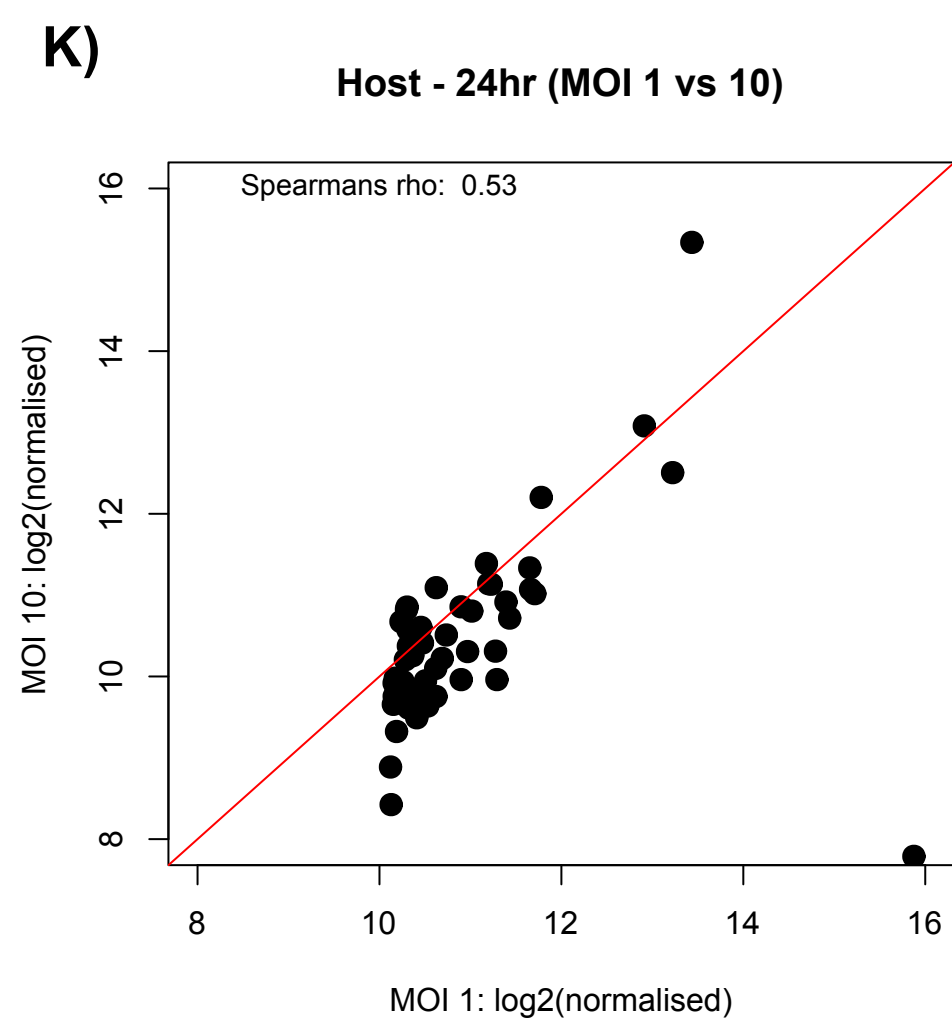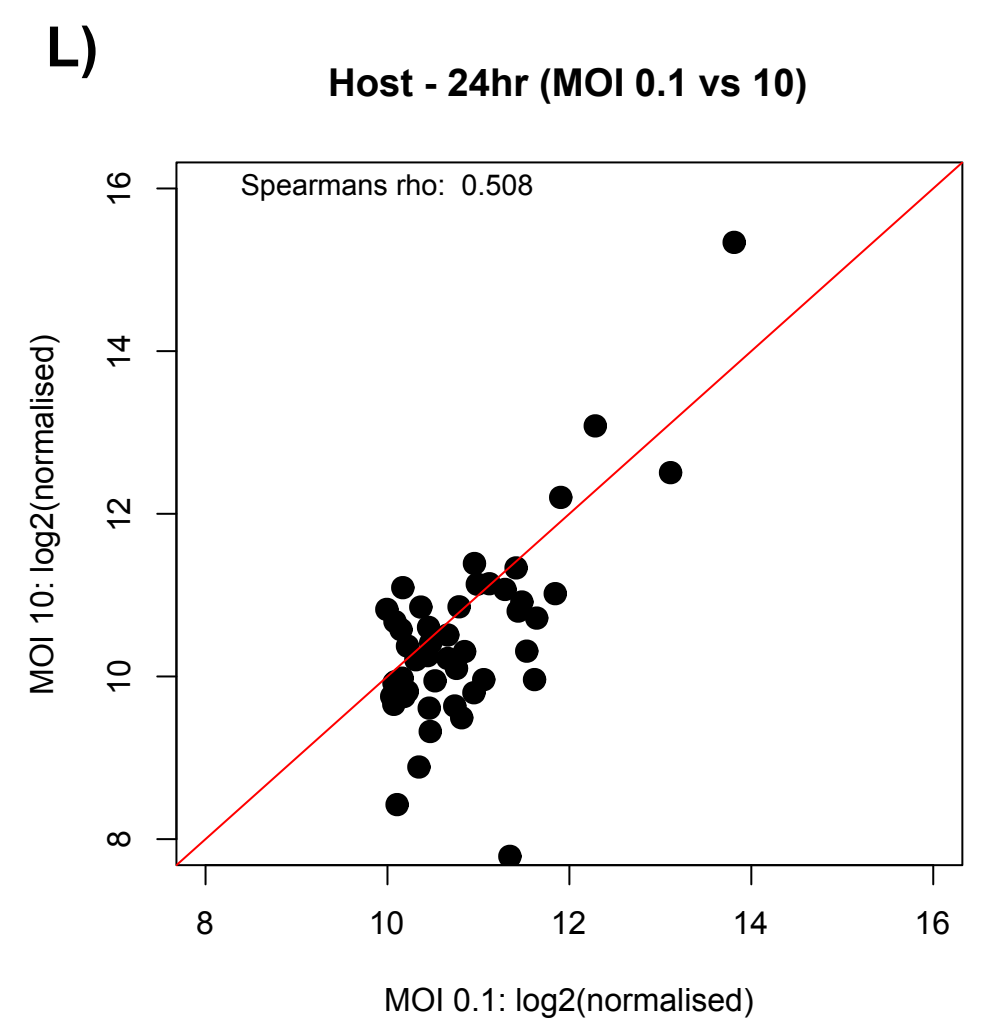

Supplement: 41598_2021_89921_MOESM2_ESM.pdf [file 41598_2021_89921_MOESM2_ESM.pdf]
